# Supplementary material
Source: MDPI journal article supplement (https://www.mdpi.com/1424-2818/16/1/69)
Supplement: s1 [file s1]

|                     |      | N    | N    | N    | N    | N    | N    | N    | N    | N    | N     | % of N | % of N | % of N | % of N | % of N | % of N | % of N | % of N | % of N | % of N       | % of N | % of mass   | % of mass    | % of mass   | % of mass |
|---------------------|------|------|------|------|------|------|------|------|------|------|-------|--------|--------|--------|--------|--------|--------|--------|--------|--------|--------------|--------|-----------|-----------|-----------|-----------|-----------|-----------|-----------|-------------|--------------|-------------|-----------|
| Species             | Mass | 2013 | 2014 | 2015 | 2016 | 2017 | 2018 | 2019 | 2020 | 2021 | TOTAL | 2013   | 2014   | 2015   | 2016   | 2017   | 2018   | 2019   | 2020   | 2021   | Mean         | 2013   | 2014      | 2015      | 2016      | 2017      | 2018      | 2019      | 2020      | 2021        | Mean         |             |           |
| Pisces indet.       | 500  | 0    | 0    | 0    | 0    | 0    | 0    | 0    | 1    | 0    | 1     | 0.00   | 0.00   | 0.00   | 0.00   | 0.00   | 0.00   | 0.00   | 0.29   | 0.00   | <b>0.03</b>  | 0.00   | 0.00      | 0.00      | 0.00      | 0.00      | 0.00      | 0.00      | 0.00      | 0.00        | 0.00         | <b>0.01</b> |           |
| Phalacrocorax carbo | 2900 | 0    | 1    | 0    | 0    | 0    | 0    | 0    | 1    | 0    | 2     | 0.00   | 0.21   | 0.00   | 0.00   | 0.00   | 0.00   | 0.00   | 0.29   | 0.00   | <b>0.06</b>  | 0.00   | 0.39      | 0.00      | 0.00      | 0.00      | 0.00      | 0.00      | 0.00      | 0.46        | 0.00         | <b>0.10</b> |           |
| Ardea cinerea       | 1700 | 1    | 2    | 1    | 1    | 4    | 0    | 2    | 4    | 0    | 15    | 0.54   | 0.41   | 0.52   | 0.30   | 2.14   | 0.00   | 0.84   | 1.17   | 0.00   | <b>0.66</b>  | 0.61   | 0.46      | 0.53      | 0.33      | 2.41      | 0.00      | 0.85      | 1.08      | 0.00        | <b>0.69</b>  |             |           |
| Cygnus cygnus       | 9000 | 0    | 0    | 2    | 0    | 0    | 0    | 1    | 0    | 0    | 3     | 0.00   | 0.00   | 1.03   | 0.00   | 0.00   | 0.00   | 0.42   | 0.00   | 0.00   | <b>0.16</b>  | 0.00   | 0.00      | 5.57      | 0.00      | 0.00      | 0.00      | 2.25      | 0.00      | 0.00        | <b>0.85</b>  |             |           |
| Anser fabalis       | 3400 | 1    | 5    | 5    | 5    | 0    | 0    | 4    | 9    | 6    | 36    | 0.54   | 1.03   | 2.58   | 1.51   | 0.00   | 0.00   | 1.69   | 2.64   | 2.27   | <b>1.36</b>  | 1.23   | 2.30      | 5.26      | 3.33      | 0.00      | 0.00      | 3.40      | 4.84      | 4.27        | <b>2.77</b>  |             |           |
| Anser albifrons     | 2450 | 1    | 19   | 5    | 10   | 7    | 6    | 12   | 27   | 18   | 108   | 0.54   | 3.91   | 2.58   | 3.01   | 3.74   | 4.58   | 5.06   | 7.92   | 6.82   | <b>4.24</b>  | 0.88   | 6.29      | 3.79      | 4.80      | 6.08      | 7.06      | 7.34      | 10.46     | 9.23        | <b>6.25</b>  |             |           |
| Anser spp.          | 2925 | 5    | 1    | 0    | 0    | 1    | 0    | 0    | 0    | 0    | 7     | 2.70   | 0.21   | 0.00   | 0.00   | 0.53   | 0.00   | 0.00   | 0.00   | 0.00   | <b>0.38</b>  | 5.27   | 0.40      | 0.00      | 0.00      | 1.04      | 0.00      | 0.00      | 0.00      | 0.00        | <b>0.72</b>  |             |           |
| Branta leucopsis    | 2050 | 0    | 3    | 1    | 0    | 0    | 1    | 0    | 0    | 0    | 5     | 0.00   | 0.62   | 0.52   | 0.00   | 0.00   | 0.76   | 0.00   | 0.00   | 0.00   | <b>0.21</b>  | 0.00   | 0.83      | 0.63      | 0.00      | 0.00      | 0.98      | 0.00      | 0.00      | 0.00        | <b>0.27</b>  |             |           |
| Anas crecca         | 302  | 3    | 2    | 1    | 7    | 4    | 0    | 4    | 5    | 2    | 30    | 1.62   | 0.41   | 0.52   | 2.11   | 2.14   | 0.00   | 1.69   | 1.47   | 0.76   | <b>1.19</b>  | 0.33   | 0.08      | 0.09      | 0.41      | 0.43      | 0.00      | 0.30      | 0.24      | 0.13        | <b>0.22</b>  |             |           |
| Anas platyrhynchos  | 1050 | 23   | 51   | 12   | 29   | 24   | 16   | 21   | 21   | 25   | 227   | 12.43  | 10.49  | 6.19   | 8.73   | 12.83  | 12.21  | 8.86   | 6.16   | 9.47   | <b>9.71</b>  | 8.71   | 7.24      | 3.90      | 5.97      | 8.93      | 8.07      | 5.51      | 3.49      | 5.50        | <b>6.32</b>  |             |           |
| Anas querquedula    | 380  | 0    | 1    | 0    | 0    | 0    | 0    | 0    | 0    | 0    | 1     | 0.00   | 0.21   | 0.00   | 0.00   | 0.00   | 0.00   | 0.00   | 0.00   | 0.00   | <b>0.02</b>  | 0.00   | 0.05      | 0.00      | 0.00      | 0.00      | 0.00      | 0.00      | 0.00      | 0.00        | <b>0.01</b>  |             |           |
| Bucephala clangula  | 738  | 0    | 1    | 0    | 1    | 1    | 0    | 0    | 0    | 2    | 5     | 0.00   | 0.21   | 0.00   | 0.30   | 0.53   | 0.00   | 0.00   | 0.00   | 0.76   | <b>0.20</b>  | 0.00   | 0.10      | 0.00      | 0.14      | 0.26      | 0.00      | 0.00      | 0.00      | 0.31        | <b>0.09</b>  |             |           |
| Pernis apivorus     | 985  | 0    | 0    | 0    | 1    | 1    | 0    | 0    | 0    | 0    | 2     | 0.00   | 0.00   | 0.00   | 0.30   | 0.53   | 0.00   | 0.00   | 0.00   | 0.00   | <b>0.09</b>  | 0.00   | 0.00      | 0.00      | 0.19      | 0.35      | 0.00      | 0.00      | 0.00      | 0.00        | <b>0.06</b>  |             |           |
| Circus pygargus     | 310  | 0    | 1    | 1    | 1    | 2    | 0    | 0    | 0    | 0    | 5     | 0.00   | 0.21   | 0.52   | 0.30   | 1.07   | 0.00   | 0.00   | 0.00   | 0.00   | <b>0.23</b>  | 0.00   | 0.04      | 0.10      | 0.06      | 0.22      | 0.00      | 0.00      | 0.00      | 0.00        | <b>0.05</b>  |             |           |
| Circus aeruginosus  | 600  | 0    | 0    | 0    | 0    | 0    | 0    | 0    | 0    | 1    | 1     | 0.00   | 0.00   | 0.00   | 0.00   | 0.00   | 0.00   | 0.00   | 0.00   | 0.38   | <b>0.04</b>  | 0.00   | 0.00      | 0.00      | 0.00      | 0.00      | 0.00      | 0.00      | 0.00      | 0.13        | <b>0.01</b>  |             |           |
| Accipiter gentilis  | 900  | 0    | 1    | 1    | 0    | 0    | 0    | 0    | 0    | 0    | 2     | 0.00   | 0.21   | 0.52   | 0.00   | 0.00   | 0.00   | 0.00   | 0.00   | 0.00   | <b>0.08</b>  | 0.00   | 0.12      | 0.28      | 0.00      | 0.00      | 0.00      | 0.00      | 0.00      | 0.00        | <b>0.04</b>  |             |           |
| Accipiter nisus     | 207  | 0    | 0    | 0    | 0    | 0    | 0    | 0    | 0    | 1    | 1     | 0.00   | 0.00   | 0.00   | 0.00   | 0.00   | 0.00   | 0.00   | 0.00   | 0.38   | <b>0.04</b>  | 0.00   | 0.00      | 0.00      | 0.00      | 0.00      | 0.00      | 0.00      | 0.04      | <b>0.00</b> |              |             |           |
| Buteo buteo         | 855  | 1    | 2    | 1    | 1    | 0    | 0    | 0    | 0    | 0    | 5     | 0.54   | 0.41   | 0.52   | 0.30   | 0.00   | 0.00   | 0.00   | 0.00   | 0.00   | <b>0.20</b>  | 0.31   | 0.23      | 0.26      | 0.17      | 0.00      | 0.00      | 0.00      | 0.00      | 0.00        | <b>0.11</b>  |             |           |
| Falco columbarius   | 190  | 0    | 1    | 0    | 0    | 0    | 0    | 0    | 0    | 0    | 1     | 0.00   | 0.21   | 0.00   | 0.00   | 0.00   | 0.00   | 0.00   | 0.00   | 0.00   | <b>0.02</b>  | 0.00   | 0.03      | 0.00      | 0.00      | 0.00      | 0.00      | 0.00      | 0.00      | 0.00        | <b>0.00</b>  |             |           |
| Bonasa bonasia      | 365  | 3    | 0    | 1    | 0    | 0    | 1    | 5    | 2    | 3    | 16    | 1.62   | 0.00   | 0.52   | 0.00   | 0.00   | 0.76   | 2.11   | 0.59   | 1.14   | <b>0.75</b>  | 0.39   | 0.00      | 0.11      | 0.00      | 0.00      | 0.18      | 0.46      | 0.12      | 0.23        | <b>0.16</b>  |             |           |
| Lagopus lagopus     | 585  | 1    | 1    | 0    | 0    | 0    | 0    | 0    | 0    | 0    | 2     | 0.54   | 0.21   | 0.00   | 0.00   | 0.00   | 0.00   | 0.00   | 0.00   | 0.00   | <b>0.08</b>  | 0.21   | 0.08      | 0.00      | 0.00      | 0.00      | 0.00      | 0.00      | 0.00      | 0.00        | <b>0.03</b>  |             |           |
| Tetrao tetrix       | 1125 | 45   | 163  | 62   | 103  | 42   | 25   | 49   | 45   | 50   | 607   | 24.32  | 33.54  | 31.96  | 31.02  | 22.46  | 19.08  | 20.68  | 13.20  | 18.94  | <b>23.91</b> | 18.26  | 24.78     | 21.58     | 22.71     | 16.75     | 13.51     | 13.77     | 8.01      | 11.78       | <b>16.81</b> |             |           |
| Tetrao urogallus    | 2960 | 6    | 35   | 10   | 17   | 12   | 6    | 18   | 24   | 11   | 150   | 3.24   | 7.20   | 5.15   | 5.12   | 6.42   | 4.58   | 7.59   | 7.04   | 4.17   | <b>5.61</b>  | 6.40   | 14.00     | 9.16      | 9.86      | 12.59     | 8.53      | 13.31     | 11.24     | 6.82        | <b>10.30</b> |             |           |
| Perdix perdix       | 390  | 1    | 0    | 0    | 1    | 0    | 0    | 0    | 5    | 0    | 7     | 0.54   | 0.00   | 0.00   | 0.30   | 0.00   | 0.00   | 0.00   | 1.47   | 0.00   | <b>0.26</b>  | 0.14   | 0.00      | 0.00      | 0.08      | 0.00      | 0.00      | 0.31      | 0.00      | <b>0.06</b> |              |             |           |
| Fulica atra         | 800  | 1    | 0    | 0    | 0    | 0    | 0    | 0    | 0    | 0    | 1     | 0.54   | 0.00   | 0.00   | 0.00   | 0.00   | 0.00   | 0.00   | 0.00   | 0.00   | <b>0.06</b>  | 0.29   | 0.00      | 0.00      | 0.00      | 0.00      | 0.00      | 0.00      | 0.00      | 0.00        | <b>0.03</b>  |             |           |
| Grus grus           | 4550 | 11   | 10   | 7    | 11   | 11   | 6    | 9    | 16   | 17   | 106   | 5.95   | 2.06   | 3.61   | 3.31   | 5.88   | 4.58   | 3.80   | 4.69   | 6.44   | <b>4.48</b>  | 18.05  | 6.15      | 9.86      | 9.81      | 17.74     | 13.11     | 10.23     | 11.52     | 16.19       | <b>12.47</b> |             |           |
| Pluvialis apricaria | 180  | 1    | 4    | 1    | 2    | 3    | 2    | 1    | 2    | 0    | 16    | 0.54   | 0.82   | 0.52   | 0.60   | 1.60   | 1.53   | 0.42   | 0.59   | 0.00   | <b>0.74</b>  | 0.06   | 0.10      | 0.06      | 0.07      | 0.19      | 0.17      | 0.04      | 0.06      | 0.00        | <b>0.08</b>  |             |           |
| Vanellus vanellus   | 205  | 7    | 10   | 5    | 5    | 4    | 2    | 4    | 6    | 6    | 50    | 3.78   | 2.06   | 2.58   | 1.51   | 2.14   | 1.53   | 1.69   | 1.76   | 2.27   | <b>2.15</b>  | 0.52   | 0.28      | 0.32      | 0.20      | 0.29      | 0.20      | 0.19      | 0.26      | <b>0.27</b> |              |             |           |
| Scolopax rusticola  | 345  | 0    | 0    | 1    | 0    | 1    | 0    | 0    | 2    | 0    | 4     | 0.00   | 0.00   | 0.52   | 0.00   | 0.53   | 0.00   | 0.00   | 0.59   | 0.00   | <b>0.18</b>  | 0.00   | 0.00      | 0.11      | 0.00      | 0.12      | 0.00      | 0.00      | 0.11      | 0.00        | <b>0.04</b>  |             |           |
| Limosa limosa       | 290  | 1    | 2    | 2    | 0    | 0    | 0    | 2    | 1    | 2    | 10    | 0.54   | 0.41   | 1.03   | 0.00   | 0.00   | 0.00   | 0.84   | 0.29   | 0.76   | <b>0.43</b>  | 0.10   | 0.08      | 0.18      | 0.00      | 0.00      | 0.00      | 0.14      | 0.05      | 0.12        | <b>0.07</b>  |             |           |
| Numenius phaeopus   | 400  | 1    | 2    | 1    | 3    | 1    | 0    | 2    | 1    | 0    | 11    | 0.54   | 0.41   | 0.52   | 0.90   | 0.53   | 0.00   | 0.84   | 0.29   | 0.00   | <b>0.45</b>  | 0.14   | 0.11      | 0.12      | 0.24      | 0.14      | 0.00      | 0.20      | 0.06      | 0.00        | <b>0.11</b>  |             |           |
| Numenius arquata    | 750  | 2    | 5    | 2    | 3    | 3    | 4    | 0    | 3    | 3    | 25    | 1.08   | 1.03   | 1.03   | 0.90   | 1.60   | 3.05   | 0.00   | 0.88   | 1.14   | <b>1.19</b>  | 0.54   | 0.51      | 0.46      | 0.44      | 0.80      | 1.44      | 0.00      | 0.36      | 0.47        | <b>0.55</b>  |             |           |
| Tringa totanus      | 120  | 1    | 0    | 0    | 0    | 1    | 0    | 3    | 0    | 0    | 5     | 0.54   | 0.00   | 0.00   | 0.00   | 0.53   | 0.00   | 1.27   | 0.00   | 0.00   | <b>0.26</b>  | 0.04   | 0.00      | 0.00      | 0.00      | 0.04      | 0.00      | 0.09      | 0.00      | 0.00        | <b>0.02</b>  |             |           |
| Tringa nebularia    | 182  | 1    | 0    | 0    | 1    | 0    | 0    | 0    | 0    | 1    | 3     | 0.54   | 0.00   | 0.00   | 0.30   | 0.00   | 0.00   | 0.00   | 0.00   | 0.38   | <b>0.14</b>  | 0.07   | 0.00      | 0.00      | 0.04      | 0.00      | 0.00      | 0.00      | 0.04      | <b>0.02</b> |              |             |           |
| Tringa ochropus     | 135  | 1    | 0    | 0    | 0    | 0    | 0    | 0    | 0    | 0    | 1     | 0.54   | 0.00   | 0.00   | 0.00   | 0.00   | 0.00   | 0.00   | 0.00   | 0.00   | <b>0.06</b>  | 0.05   | 0.00      | 0.00      | 0.00      | 0.00      | 0.00      | 0.00      | 0.00      | 0.00        | <b>0.01</b>  |             |           |
| Tringa glareola     | 65   | 0    | 0    | 0    | 1    | 2    | 2    | 0    | 0    | 2    | 7     | 0.00   | 0.00   | 0.00   | 0.30   | 1.07   | 1.53   | 0.00   | 0.00   | 0.76   | <b>0.41</b>  | 0.00   | 0.00      | 0.00      | 0.01      | 0.05      | 0.06      | 0.00      | 0.00      | 0.03        | <b>0.02</b>  |             |           |
| Larus ridibundus    | 270  | 0    | 3    | 0    | 4    | 1    | 2    | 3    | 2    | 1    | 17    | 0.00   | 0.62   | 0.00   | 1.20   | 0.53   | 1.53   | 1.27   | 0.59   | 0.38   | <b>0.68</b>  | 0.00   | 0.11      | 0.00      | 0.21      | 0.10      | 0.26      | 0.20      | 0.09      | 0.06        | <b>0.11</b>  |             |           |
| Larus canus         | 415  | 0    | 2    | 0    | 4    | 1    | 0    | 2    | 2    | 3    | 14    | 0.00   | 0.41   | 0.00   | 1.20   | 0.53   | 0.00   | 0.84   | 0.59   | 1.14   | <b>0.52</b>  | 0.00   | 0.11      | 0.00      | 0.33      | 0.15      | 0.00      | 0.21      | 0.13      | 0.26        | <b>0.13</b>  |             |           |
| Larus argentatus    | 1195 | 0    | 1    | 0    | 2    | 3    | 0    | 2    | 5    | 1    | 14    | 0.00   | 0.21   | 0.00   | 0.60   | 1.60   | 0.00   | 0.84   | 1.47   | 0.38   | <b>0.57</b>  | 0.00   | 0.16      | 0.00      | 0.47      | 1.27      | 0.00      | 0.60      | 0.95      | 0.25        | <b>0.41</b>  |             |           |
| Columba palumbus    | 475  | 2    | 5    | 2    | 4    | 2    | 4    | 6    | 5    | 4    | 34    | 1.08   | 1.03   | 1.03   | 1.20   | 1.07   | 3.05   | 2.53   | 1.47   | 1.52   | <b>1.55</b>  | 0.34   | 0.32      | 0.29      | 0.37      | 0.34      | 0.91      | 0.71      | 0.38      | 0.40        | <b>0.45</b>  |             |           |
| Columba livia       | 282  | 0    | 0    | 0    | 0    | 0    | 0    | 0    | 1    | 0    | 1     | 0.00   | 0.00   | 0.00   | 0.00   | 0.00   | 0.00   | 0.00   | 0.29   | 0.00   | <b>0.03</b>  | 0.00   | 0.00      | 0.00      | 0.00      | 0.00      | 0.00      | 0.00      | 0.04      | 0.00        | <b>0.01</b>  |             |           |
| Cuculus canorus     | 123  | 0    | 2    | 0    | 0    | 1    | 0    | 0    | 0    | 0    | 3     | 0.00   | 0.41   | 0.00   | 0.00   | 0.53   | 0.00   | 0.00   | 0.00   | 0.00   | <b>0.11</b>  | 0.00   | 0.03      | 0.00      | 0.00      | 0.04      | 0.00      | 0.00      | 0.00      | 0.00        | <b>0.01</b>  |             |           |
| Strix uralensis     | 697  | 0    | 5    | 2    | 6    | 1    | 2    | 1    | 4    | 5    | 26    | 0.00   | 1.03   | 1.03   | 1.81   | 0.53   | 1.53   | 0.42   | 1.17   | 1.89   | <b>1.05</b>  | 0.00   | 0.47      | 0.43      | 0.82      | 0.25      | 0.67      | 0.17      | 0.44      | 0.73        | <b>0.44</b>  |             |           |
| Strix aluco         | 522  | 0    | 0    | 0    | 0    | 0    | 1    | 0    | 0    | 0    | 1     | 0.00   |        |        |        |        |        |        |        |        |              |        |           |           |           |           |           |           |           |             |              |             |           |

|                        |      |     |     |     |     |     |     |     |     |     |      |      |      |      |      |      |       |       |      |      |      |       |       |       |       |      |       |       |       |       |       |
|------------------------|------|-----|-----|-----|-----|-----|-----|-----|-----|-----|------|------|------|------|------|------|-------|-------|------|------|------|-------|-------|-------|-------|------|-------|-------|-------|-------|-------|
| Alauda arvensis        | 36   | 0   | 0   | 0   | 1   | 0   | 0   | 0   | 3   | 1   | 5    | 0.00 | 0.00 | 0.00 | 0.30 | 0.00 | 0.00  | 0.00  | 0.88 | 0.38 | 0.17 | 0.00  | 0.00  | 0.00  | 0.01  | 0.00 | 0.00  | 0.00  | 0.02  | 0.01  | 0.00  |
| Anthus trivialis       | 24   | 0   | 0   | 1   | 0   | 0   | 0   | 0   | 0   | 0   | 1    | 0.00 | 0.00 | 0.52 | 0.00 | 0.00 | 0.00  | 0.00  | 0.00 | 0.06 | 0.00 | 0.00  | 0.01  | 0.00  | 0.00  | 0.00 | 0.00  | 0.00  | 0.00  | 0.00  | 0.00  |
| Anthus pratensis       | 24   | 0   | 0   | 0   | 0   | 1   | 0   | 0   | 0   | 0   | 1    | 0.00 | 0.00 | 0.00 | 0.00 | 0.53 | 0.00  | 0.00  | 0.00 | 0.06 | 0.00 | 0.00  | 0.00  | 0.00  | 0.01  | 0.00 | 0.00  | 0.00  | 0.00  | 0.00  | 0.00  |
| Motacilla alba         | 22   | 0   | 1   | 0   | 0   | 0   | 0   | 0   | 0   | 0   | 1    | 0.00 | 0.21 | 0.00 | 0.00 | 0.00 | 0.00  | 0.00  | 0.00 | 0.02 | 0.00 | 0.00  | 0.00  | 0.00  | 0.00  | 0.00 | 0.00  | 0.00  | 0.00  | 0.00  | 0.00  |
| Bombycilla garrulus    | 18   | 1   | 0   | 0   | 0   | 0   | 0   | 0   | 0   | 0   | 1    | 0.54 | 0.00 | 0.00 | 0.00 | 0.00 | 0.00  | 0.00  | 0.00 | 0.06 | 0.01 | 0.00  | 0.00  | 0.00  | 0.00  | 0.00 | 0.00  | 0.00  | 0.00  | 0.00  | 0.00  |
| Turdus merula          | 100  | 1   | 1   | 1   | 3   | 0   | 2   | 4   | 2   | 2   | 16   | 0.54 | 0.21 | 0.52 | 0.90 | 0.00 | 1.53  | 1.69  | 0.59 | 0.76 | 0.75 | 0.04  | 0.01  | 0.03  | 0.06  | 0.00 | 0.10  | 0.10  | 0.03  | 0.04  | 0.04  |
| Turdus pilaris         | 104  | 0   | 0   | 0   | 0   | 1   | 0   | 0   | 1   | 1   | 3    | 0.00 | 0.00 | 0.00 | 0.00 | 0.53 | 0.00  | 0.00  | 0.29 | 0.38 | 0.13 | 0.00  | 0.00  | 0.00  | 0.00  | 0.04 | 0.00  | 0.00  | 0.02  | 0.02  | 0.01  |
| Turdus philomelos      | 67   | 0   | 0   | 1   | 1   | 0   | 0   | 3   | 1   | 1   | 7    | 0.00 | 0.00 | 0.52 | 0.30 | 0.00 | 0.00  | 1.27  | 0.29 | 0.38 | 0.31 | 0.00  | 0.00  | 0.02  | 0.01  | 0.00 | 0.00  | 0.05  | 0.01  | 0.01  | 0.01  |
| Turdus viscivorus      | 116  | 3   | 3   | 1   | 2   | 0   | 0   | 3   | 2   | 1   | 15   | 1.62 | 0.62 | 0.52 | 0.60 | 0.00 | 0.00  | 1.27  | 0.59 | 0.38 | 0.62 | 0.13  | 0.05  | 0.04  | 0.05  | 0.00 | 0.00  | 0.09  | 0.04  | 0.02  | 0.04  |
| Parus palustris        | 12   | 0   | 0   | 0   | 0   | 1   | 0   | 0   | 0   | 0   | 1    | 0.00 | 0.00 | 0.00 | 0.00 | 0.53 | 0.00  | 0.00  | 0.00 | 0.00 | 0.06 | 0.00  | 0.00  | 0.00  | 0.00  | 0.00 | 0.00  | 0.00  | 0.00  | 0.00  | 0.00  |
| Fringilla coelebs      | 22   | 0   | 0   | 0   | 0   | 0   | 0   | 0   | 0   | 1   | 1    | 0.00 | 0.00 | 0.00 | 0.00 | 0.00 | 0.00  | 0.00  | 0.00 | 0.38 | 0.04 | 0.00  | 0.00  | 0.00  | 0.00  | 0.00 | 0.00  | 0.00  | 0.00  | 0.00  | 0.00  |
| Oriolus oriolus        | 72   | 0   | 1   | 0   | 0   | 0   | 0   | 0   | 0   | 0   | 1    | 0.00 | 0.21 | 0.00 | 0.00 | 0.00 | 0.00  | 0.00  | 0.00 | 0.00 | 0.02 | 0.00  | 0.01  | 0.00  | 0.00  | 0.00 | 0.00  | 0.00  | 0.00  | 0.00  | 0.00  |
| Lanius collurio        | 30   | 0   | 0   | 0   | 0   | 0   | 1   | 0   | 0   | 0   | 1    | 0.00 | 0.00 | 0.00 | 0.00 | 0.00 | 0.76  | 0.00  | 0.00 | 0.00 | 0.08 | 0.00  | 0.00  | 0.00  | 0.00  | 0.00 | 0.01  | 0.00  | 0.00  | 0.00  | 0.00  |
| Lanius excubitor       | 66   | 0   | 4   | 0   | 5   | 3   | 2   | 1   | 6   | 1   | 23   | 0.00 | 0.82 | 0.00 | 1.51 | 1.60 | 1.53  | 0.42  | 1.76 | 0.38 | 0.89 | 0.00  | 0.04  | 0.00  | 0.06  | 0.07 | 0.06  | 0.02  | 0.06  | 0.01  | 0.04  |
| Garrulus glandarius    | 165  | 2   | 7   | 5   | 5   | 2   | 1   | 3   | 1   | 3   | 30   | 1.08 | 1.44 | 2.58 | 1.51 | 1.07 | 0.76  | 1.27  | 0.29 | 1.14 | 1.24 | 0.12  | 0.16  | 0.26  | 0.16  | 0.12 | 0.08  | 0.12  | 0.03  | 0.10  | 0.13  |
| Pica pica              | 280  | 0   | 1   | 0   | 0   | 0   | 0   | 0   | 0   | 0   | 1    | 0.00 | 0.21 | 0.00 | 0.00 | 0.00 | 0.00  | 0.00  | 0.00 | 0.00 | 0.02 | 0.00  | 0.04  | 0.00  | 0.00  | 0.00 | 0.00  | 0.00  | 0.00  | 0.00  | 0.00  |
| Corvus monedula        | 292  | 0   | 1   | 0   | 1   | 0   | 0   | 0   | 3   | 1   | 6    | 0.00 | 0.21 | 0.00 | 0.30 | 0.00 | 0.00  | 0.00  | 0.88 | 0.38 | 0.20 | 0.00  | 0.04  | 0.00  | 0.06  | 0.00 | 0.00  | 0.00  | 0.14  | 0.06  | 0.03  |
| Corvus cornix          | 565  | 8   | 1   | 3   | 1   | 0   | 0   | 3   | 4   | 5   | 25   | 4.32 | 0.21 | 1.55 | 0.30 | 0.00 | 0.00  | 1.27  | 1.17 | 1.89 | 1.19 | 1.63  | 0.08  | 0.52  | 0.11  | 0.00 | 0.00  | 0.42  | 0.36  | 0.59  | 0.41  |
| Corvus corax           | 1175 | 13  | 36  | 8   | 26  | 14  | 15  | 14  | 24  | 17  | 169  | 7.03 | 7.41 | 4.12 | 7.83 | 7.49 | 11.45 | 5.91  | 7.04 | 6.44 | 7.19 | 5.51  | 5.72  | 2.91  | 5.99  | 5.83 | 8.46  | 4.11  | 4.46  | 4.18  | 5.21  |
| Sturnus vulgaris       | 80   | 1   | 0   | 2   | 0   | 0   | 1   | 0   | 0   | 0   | 4    | 0.54 | 0.00 | 1.03 | 0.00 | 0.00 | 0.76  | 0.00  | 0.00 | 0.00 | 0.26 | 0.03  | 0.00  | 0.05  | 0.00  | 0.00 | 0.04  | 0.00  | 0.00  | 0.00  | 0.01  |
| Mammalia indet.        | 1658 | 0   | 3   | 2   | 0   | 1   | 1   | 0   | 0   | 0   | 8    | 0.00 | 0.62 | 1.03 | 0.00 | 0.53 | 0.76  | 0.00  | 0.00 | 0.00 | 0.33 | 0.00  | 0.67  | 1.03  | 0.00  | 0.59 | 0.80  | 0.00  | 0.00  | 0.00  | 0.34  |
| Lepus sp               | 3000 | 12  | 21  | 13  | 25  | 9   | 14  | 24  | 33  | 26  | 183  | 6.49 | 4.32 | 6.70 | 7.53 | 4.81 | 10.69 | 10.13 | 9.68 | 9.85 | 7.80 | 12.98 | 8.51  | 12.07 | 14.70 | 9.57 | 20.17 | 17.98 | 15.66 | 16.33 | 14.16 |
| Sciurus vulgaris       | 302  | 1   | 1   | 0   | 0   | 0   | 1   | 1   | 0   | 1   | 6    | 0.54 | 0.21 | 0.00 | 0.00 | 0.00 | 0.76  | 0.42  | 0.00 | 0.38 | 0.26 | 0.11  | 0.04  | 0.00  | 0.00  | 0.00 | 0.15  | 0.08  | 0.00  | 0.06  | 0.05  |
| Microtus               | 30   | 1   | 0   | 0   | 0   | 0   | 0   | 0   | 0   | 0   | 1    | 0.54 | 0.00 | 0.00 | 0.00 | 0.00 | 0.00  | 0.00  | 0.00 | 0.06 | 0.01 | 0.00  | 0.00  | 0.00  | 0.00  | 0.00 | 0.00  | 0.00  | 0.00  | 0.00  | 0.00  |
| Arvicola terrestris    | 120  | 0   | 0   | 0   | 0   | 0   | 0   | 0   | 1   | 1   | 2    | 0.00 | 0.00 | 0.00 | 0.00 | 0.00 | 0.00  | 0.00  | 0.29 | 0.38 | 0.07 | 0.00  | 0.00  | 0.00  | 0.00  | 0.00 | 0.00  | 0.00  | 0.02  | 0.03  | 0.01  |
| Vulpes vulpes          | 2500 | 6   | 3   | 2   | 3   | 0   | 0   | 3   | 6   | 3   | 29   | 3.24 | 0.62 | 1.03 | 0.90 | 0.00 | 0.00  | 1.27  | 1.76 | 1.14 | 1.11 | 5.41  | 1.01  | 1.55  | 1.47  | 0.00 | 0.00  | 1.87  | 2.37  | 1.57  | 1.71  |
| Nyctereutes procynoide | 2500 | 2   | 30  | 10  | 19  | 4   | 4   | 11  | 15  | 8   | 112  | 1.08 | 6.17 | 5.15 | 5.72 | 2.14 | 3.05  | 4.64  | 4.40 | 3.03 | 3.93 | 1.80  | 10.13 | 7.74  | 9.31  | 3.55 | 4.80  | 6.87  | 5.93  | 4.19  | 6.13  |
| Canis familiaris       | 2500 | 1   | 0   | 0   | 0   | 0   | 0   | 0   | 0   | 0   | 1    | 0.54 | 0.00 | 0.00 | 0.00 | 0.00 | 0.00  | 0.00  | 0.00 | 0.00 | 0.06 | 0.90  | 0.00  | 0.00  | 0.00  | 0.00 | 0.00  | 0.00  | 0.00  | 0.00  | 0.10  |
| Martes martes          | 1200 | 11  | 18  | 12  | 12  | 14  | 3   | 10  | 29  | 16  | 126  | 5.95 | 3.70 | 6.19 | 3.61 | 7.49 | 2.29  | 4.22  | 8.50 | 6.06 | 5.33 | 4.76  | 2.92  | 4.46  | 2.82  | 5.96 | 1.73  | 3.00  | 5.50  | 4.02  | 3.89  |
| Meles meles            | 1500 | 0   | 0   | 0   | 0   | 0   | 0   | 0   | 1   | 0   | 1    | 0.00 | 0.00 | 0.00 | 0.00 | 0.00 | 0.00  | 0.00  | 0.29 | 0.00 | 0.03 | 0.00  | 0.00  | 0.00  | 0.00  | 0.00 | 0.00  | 0.24  | 0.00  | 0.03  |       |
| Mustela putorius       | 680  | 0   | 0   | 0   | 0   | 0   | 1   | 0   | 1   | 0   | 2    | 0.00 | 0.00 | 0.00 | 0.00 | 0.00 | 0.76  | 0.00  | 0.29 | 0.00 | 0.12 | 0.00  | 0.00  | 0.00  | 0.00  | 0.00 | 0.33  | 0.00  | 0.11  | 0.00  | 0.05  |
| Mustela vison          | 700  | 0   | 3   | 0   | 0   | 0   | 2   | 0   | 0   | 0   | 5    | 0.00 | 0.62 | 0.00 | 0.00 | 0.00 | 1.53  | 0.00  | 0.00 | 0.00 | 0.24 | 0.00  | 0.28  | 0.00  | 0.00  | 0.00 | 0.67  | 0.00  | 0.00  | 0.10  |       |
| Felis catus            | 1000 | 0   | 0   | 0   | 1   | 0   | 0   | 1   | 0   | 0   | 3    | 0.00 | 0.00 | 0.00 | 0.30 | 0.00 | 0.00  | 0.42  | 0.00 | 0.00 | 0.08 | 0.00  | 0.00  | 0.00  | 0.20  | 0.00 | 0.00  | 0.25  | 0.00  | 0.00  | 0.05  |
| Sus scrofa             | 1500 | 0   | 0   | 2   | 0   | 0   | 0   | 0   | 0   | 0   | 2    | 0.00 | 0.00 | 1.03 | 0.00 | 0.00 | 0.00  | 0.00  | 0.00 | 0.00 | 0.11 | 0.00  | 0.00  | 0.93  | 0.00  | 0.00 | 0.00  | 0.00  | 0.00  | 0.10  |       |
| Vitula eligans         | 2000 | 0   | 1   | 0   | 0   | 0   | 0   | 0   | 0   | 0   | 1    | 0.00 | 0.21 | 0.00 | 0.00 | 0.00 | 0.00  | 0.00  | 0.00 | 0.00 | 0.02 | 0.00  | 0.27  | 0.00  | 0.00  | 0.00 | 0.00  | 0.00  | 0.00  | 0.03  |       |
| Cervus elaphus         | 2000 | 0   | 0   | 1   | 0   | 0   | 0   | 0   | 0   | 0   | 1    | 0.00 | 0.00 | 0.52 | 0.00 | 0.00 | 0.00  | 0.00  | 0.00 | 0.06 | 0.00 | 0.00  | 0.62  | 0.00  | 0.00  | 0.00 | 0.00  | 0.00  | 0.00  | 0.07  |       |
| Capreolus capreolus    | 5000 | 2   | 6   | 3   | 4   | 2   | 3   | 4   | 13  | 11  | 48   | 1.08 | 1.23 | 1.55 | 1.20 | 1.07 | 2.29  | 1.69  | 3.81 | 4.17 | 2.01 | 3.61  | 4.05  | 4.64  | 3.92  | 3.55 | 7.20  | 4.99  | 10.28 | 11.51 | 5.97  |
| Total                  |      | 185 | 486 | 194 | 332 | 187 | 131 | 237 | 341 | 264 | 2439 | 100  | 100  | 100  | 100  | 100  | 100   | 100   | 100  | 100  | 100  | 100   | 100   | 100   | 100   | 100  | 100   | 100   | 100   | 100   | 100   |
